# Supplementary material for: Comparative Study of Two Commercial Photovoltaic Panels under Natural Sunlight Conditions
Source: Hindawi journal article supplement (doi:10.1155/2019/8365175), 2019-11-22
Supplement: f1 [file 8365175.f1.pdf]

## Annex

The maximum power for different tilt angles (monocrystalline and amorphous panels)

| Tilt angle | $P_{\max}$ m-Si [W] | $P_{\max}$ a-Si [W] |
|------------|---------------------|---------------------|
| 0          | 0.52                | 0.254               |
| 10         | 0.592               | 0.285               |
| 20         | 0.654               | 0.309               |
| 30         | 0.687               | 0.325               |
| 40         | 0.703               | 0.328               |
| 50         | 0.69                | 0.323               |
| 60         | 0.661               | 0.31                |
| 70         | 0.606               | 0.286               |
| 80         | 0.537               | 0.255               |
| 90         | 0.447               | 0.214               |

The normalized power for different tilt angles (monocrystalline and amorphous panels)

| Tilt angle | $P_{\max}$ m-Si [W] | $P_{\max}$ a-Si [W] |
|------------|---------------------|---------------------|
| 0          | 73.96               | 77.43               |
| 10         | 84.21               | 86.89               |
| 20         | 93.02               | 94.20               |
| 30         | 97.72               | 99.08               |
| 40         | 100                 | 100                 |
| 50         | 98.15               | 98.47               |
| 60         | 94.02               | 94.51               |
| 70         | 86.20               | 87.19               |
| 80         | 76.38               | 77.74               |
| 90         | 63.58               | 65.24               |

The average maximum power vs irradiance (Fig.4)

| Irradiance | $P_{\max}$ m-Si [W] | $P_{\max}$ a-Si [W] | $P_{\max}$ difference [W] |
|------------|---------------------|---------------------|---------------------------|
| 100        | 0.106637            | 0.044429            | 0.0622082                 |
| 200        | 0.187428            | 0.0782022           | 0.109226                  |
| 300        | 0.26822             | 0.111975            | 0.156244                  |
| 400        | 0.349011            | 0.145749            | 0.203262                  |
| 500        | 0.429802            | 0.179522            | 0.25028                   |
| 600        | 0.510593            | 0.213295            | 0.297298                  |
| 700        | 0.591384            | 0.247068            | 0.344316                  |
| 800        | 0.672175            | 0.280841            | 0.391334                  |
| 900        | 0.752966            | 0.314614            | 0.438352                  |

|    |       |       |
|----|-------|-------|
| 90 | 63.58 | 65.24 |
|----|-------|-------|
